# Supplementary material
Source: PubMed Central journal article supplement (PMC3247958)
Supplement: supp_M111.290296_jbc.M111.290296-1.pdf [file supp_M111.290296_jbc.M111.290296-1.pdf]

## SUPPLEMENTARY MATERIALS

**Table S1.** List of hedyotide B2 modification products.

| Peptide | Amino Acid Sequence                                                                                              | MW <sup>a</sup> | Observed <sup>b</sup> |
|---------|------------------------------------------------------------------------------------------------------------------|-----------------|-----------------------|
| B2      | IQC <b>GES</b> C <b>VW</b> ..IP <b>C</b> ISSAW..G <b>CS</b> C <b>KNKI</b> C <b>SS</b>                            | 2985            | Y                     |
| B2a     | IQC <b>GES</b> C <b>VW</b> <sub>oia</sub> IP <b>C</b> ISSAW..G <b>CS</b> C <b>KNKI</b> C <b>SS</b>               | 3001            | Y                     |
| B2b     | IQC <b>GES</b> C <b>VW</b> ..IP <b>C</b> ISSAW <sub>oia</sub> G <b>CS</b> C <b>KNKI</b> C <b>SS</b>              | 3001            | Y                     |
| B2c     | IQC <b>GES</b> C <b>VW</b> <sub>nfk</sub> IP <b>C</b> ISSAW..G <b>CS</b> C <b>KNKI</b> C <b>SS</b>               | 3017            | Y                     |
| B2d     | IQC <b>GES</b> C <b>VW</b> ..IP <b>C</b> ISSAW <sub>nfk</sub> G <b>CS</b> C <b>KNKI</b> C <b>SS</b>              | 3017            | Y                     |
| B2e     | IQC <b>GES</b> C <b>VW</b> <sub>kyn</sub> IP <b>C</b> ISSAW..G <b>CS</b> C <b>KNKI</b> C <b>SS</b>               | 2989            | Y                     |
| B2f     | IQC <b>GES</b> C <b>VW</b> ..IP <b>C</b> ISSAW <sub>kyn</sub> G <b>CS</b> C <b>KNKI</b> C <b>SS</b>              | 2989            | Y                     |
| B2g     | IQC <b>GES</b> C <b>VW</b> <sub>oia</sub> IP <b>C</b> ISSAW <sub>oia</sub> G <b>CS</b> C <b>KNKI</b> C <b>SS</b> | 3017            | Y                     |
| B2h     | IQC <b>GES</b> C <b>VW</b> <sub>nfk</sub> IP <b>C</b> ISSAW <sub>nfk</sub> G <b>CS</b> C <b>KNKI</b> C <b>SS</b> | 3049            | N                     |
| B2i     | IQC <b>GES</b> C <b>VW</b> <sub>kyn</sub> IP <b>C</b> ISSAW <sub>kyn</sub> G <b>CS</b> C <b>KNKI</b> C <b>SS</b> | 2993            | N                     |
| B2j     | IQC <b>GES</b> C <b>VW</b> <sub>oia</sub> IP <b>C</b> ISSAW <sub>nfk</sub> G <b>CS</b> C <b>KNKI</b> C <b>SS</b> | 3033            | Y                     |
| B2k     | IQC <b>GES</b> C <b>VW</b> <sub>nfk</sub> IP <b>C</b> ISSAW <sub>oia</sub> G <b>CS</b> C <b>KNKI</b> C <b>SS</b> | 3033            | Y                     |
| B2l     | IQC <b>GES</b> C <b>VW</b> <sub>oia</sub> IP <b>C</b> ISSAW <sub>kyn</sub> G <b>CS</b> C <b>KNKI</b> C <b>SS</b> | 3005            | Y                     |
| B2m     | IQC <b>GES</b> C <b>VW</b> <sub>kyn</sub> IP <b>C</b> ISSAW <sub>oia</sub> G <b>CS</b> C <b>KNKI</b> C <b>SS</b> | 3005            | Y                     |
| B2n     | IQC <b>GES</b> C <b>VW</b> <sub>nfk</sub> IP <b>C</b> ISSAW <sub>kyn</sub> G <b>CS</b> C <b>KNKI</b> C <b>SS</b> | 3021            | Y                     |
| B2o     | IQC <b>GES</b> C <b>VW</b> <sub>kyn</sub> IP <b>C</b> ISSAW <sub>nfk</sub> G <b>CS</b> C <b>KNKI</b> C <b>SS</b> | 3021            | Y                     |
| B3      | QC <b>GES</b> C <b>VW</b> ..IP <b>C</b> ISSAW..G <b>CS</b> C <b>KNKI</b> C <b>SS</b>                             | 2872            | Y                     |
| B3a     | QC <b>GES</b> C <b>VW</b> <sub>oia</sub> IP <b>C</b> ISSAW..G <b>CS</b> C <b>KNKI</b> C <b>SS</b>                | 2888            | N                     |
| B3b     | QC <b>GES</b> C <b>VW</b> ..IP <b>C</b> ISSAW <sub>oia</sub> G <b>CS</b> C <b>KNKI</b> C <b>SS</b>               | 2888            | N                     |
| B3c     | QC <b>GES</b> C <b>VW</b> <sub>nfk</sub> IP <b>C</b> ISSAW..G <b>CS</b> C <b>KNKI</b> C <b>SS</b>                | 2904            | N                     |
| B3d     | QC <b>GES</b> C <b>VW</b> ..IP <b>C</b> ISSAW <sub>nfk</sub> G <b>CS</b> C <b>KNKI</b> C <b>SS</b>               | 2904            | N                     |
| B3e     | QC <b>GES</b> C <b>VW</b> <sub>kyn</sub> IP <b>C</b> ISSAW..G <b>CS</b> C <b>KNKI</b> C <b>SS</b>                | 2876            | N                     |
| B3f     | QC <b>GES</b> C <b>VW</b> ..IP <b>C</b> ISSAW <sub>kyn</sub> G <b>CS</b> C <b>KNKI</b> C <b>SS</b>               | 2876            | N                     |
| B3g     | QC <b>GES</b> C <b>VW</b> <sub>oia</sub> IP <b>C</b> ISSAW <sub>oia</sub> G <b>CS</b> C <b>KNKI</b> C <b>SS</b>  | 2904            | N                     |
| B3h     | QC <b>GES</b> C <b>VW</b> <sub>nfk</sub> IP <b>C</b> ISSAW <sub>nfk</sub> G <b>CS</b> C <b>KNKI</b> C <b>SS</b>  | 2936            | N                     |
| B3i     | QC <b>GES</b> C <b>VW</b> <sub>kyn</sub> IP <b>C</b> ISSAW <sub>kyn</sub> G <b>CS</b> C <b>KNKI</b> C <b>SS</b>  | 2880            | N                     |
| B3j     | QC <b>GES</b> C <b>VW</b> <sub>oia</sub> IP <b>C</b> ISSAW <sub>nfk</sub> G <b>CS</b> C <b>KNKI</b> C <b>SS</b>  | 2920            | N                     |

|     |                                                                   |      |   |
|-----|-------------------------------------------------------------------|------|---|
| B3k | Q*CGESC[VW <sub>nfk</sub> IP]C[ISSAW <sub>oia</sub> GCSC]KNKIC[SS | 2920 | N |
| B3l | Q*CGESC[VW <sub>oia</sub> IP]C[ISSAW <sub>kyn</sub> GCSC]KNKIC[SS | 2892 | N |
| B3m | Q*CGESC[VW <sub>kyn</sub> IP]C[ISSAW <sub>oia</sub> GCSC]KNKIC[SS | 2892 | N |
| B3n | Q*CGESC[VW <sub>nfk</sub> IP]C[ISSAW <sub>kyn</sub> GCSC]KNKIC[SS | 2908 | N |
| B3o | Q*CGESC[VW <sub>kyn</sub> IP]C[ISSAW <sub>nfk</sub> GCSC]KNKIC[SS | 2908 | N |
| B4  | Q*CGESC[VW...IP]C[ISSAW...GCSC]KNKIC[SS                           | 2855 | Y |
| B4a | Q*CGESC[VW <sub>oia</sub> IP]C[ISSAW...GCSC]KNKIC[SS              | 2871 | N |
| B4b | Q*CGESC[VW...IP]C[ISSAW <sub>oia</sub> GCSC]KNKIC[SS              | 2871 | N |
| B4c | Q*CGESC[VW <sub>nfk</sub> IP]C[ISSAW...GCSC]KNKIC[SS              | 2887 | N |
| B4d | Q*CGESC[VW...IP]C[ISSAW <sub>nfk</sub> GCSC]KNKIC[SS              | 2887 | N |
| B4e | Q*CGESC[VW <sub>kyn</sub> IP]C[ISSAW...GCSC]KNKIC[SS              | 2859 | N |
| B4f | Q*CGESC[VW...IP]C[ISSAW <sub>kyn</sub> GCSC]KNKIC[SS              | 2859 | N |
| B4g | Q*CGESC[VW <sub>oia</sub> IP]C[ISSAW <sub>oia</sub> GCSC]KNKIC[SS | 2887 | N |
| B4h | Q*CGESC[VW <sub>nfk</sub> IP]C[ISSAW <sub>nfk</sub> GCSC]KNKIC[SS | 2919 | N |
| B4i | Q*CGESC[VW <sub>kyn</sub> IP]C[ISSAW <sub>kyn</sub> GCSC]KNKIC[SS | 2863 | N |
| B4j | Q*CGESC[VW <sub>oia</sub> IP]C[ISSAW <sub>nfk</sub> GCSC]KNKIC[SS | 2903 | N |
| B4k | Q*CGESC[VW <sub>nfk</sub> IP]C[ISSAW <sub>oia</sub> GCSC]KNKIC[SS | 2903 | N |
| B4l | Q*CGESC[VW <sub>oia</sub> IP]C[ISSAW <sub>kyn</sub> GCSC]KNKIC[SS | 2875 | N |
| B4m | Q*CGESC[VW <sub>kyn</sub> IP]C[ISSAW <sub>oia</sub> GCSC]KNKIC[SS | 2875 | N |
| B4n | Q*CGESC[VW <sub>nfk</sub> IP]C[ISSAW <sub>kyn</sub> GCSC]KNKIC[SS | 2891 | N |
| B4o | Q*CGESC[VW <sub>kyn</sub> IP]C[ISSAW <sub>nfk</sub> GCSC]KNKIC[SS | 2891 | N |

<sup>a</sup> Molecular weights are reported as monoisotopic masses. <sup>b</sup> Observed oxidized derivatives of hedyotide B2. Y is observed and N is not observed under our experimental conditions. Modified tryptophan residues are written in the sequence table as W<sub>oia</sub>, W<sub>nfk</sub> and W<sub>kyn</sub> to denote oxindolylalanine (oia), N-formylkynurenine (nfk) and kynurenine, respectively.

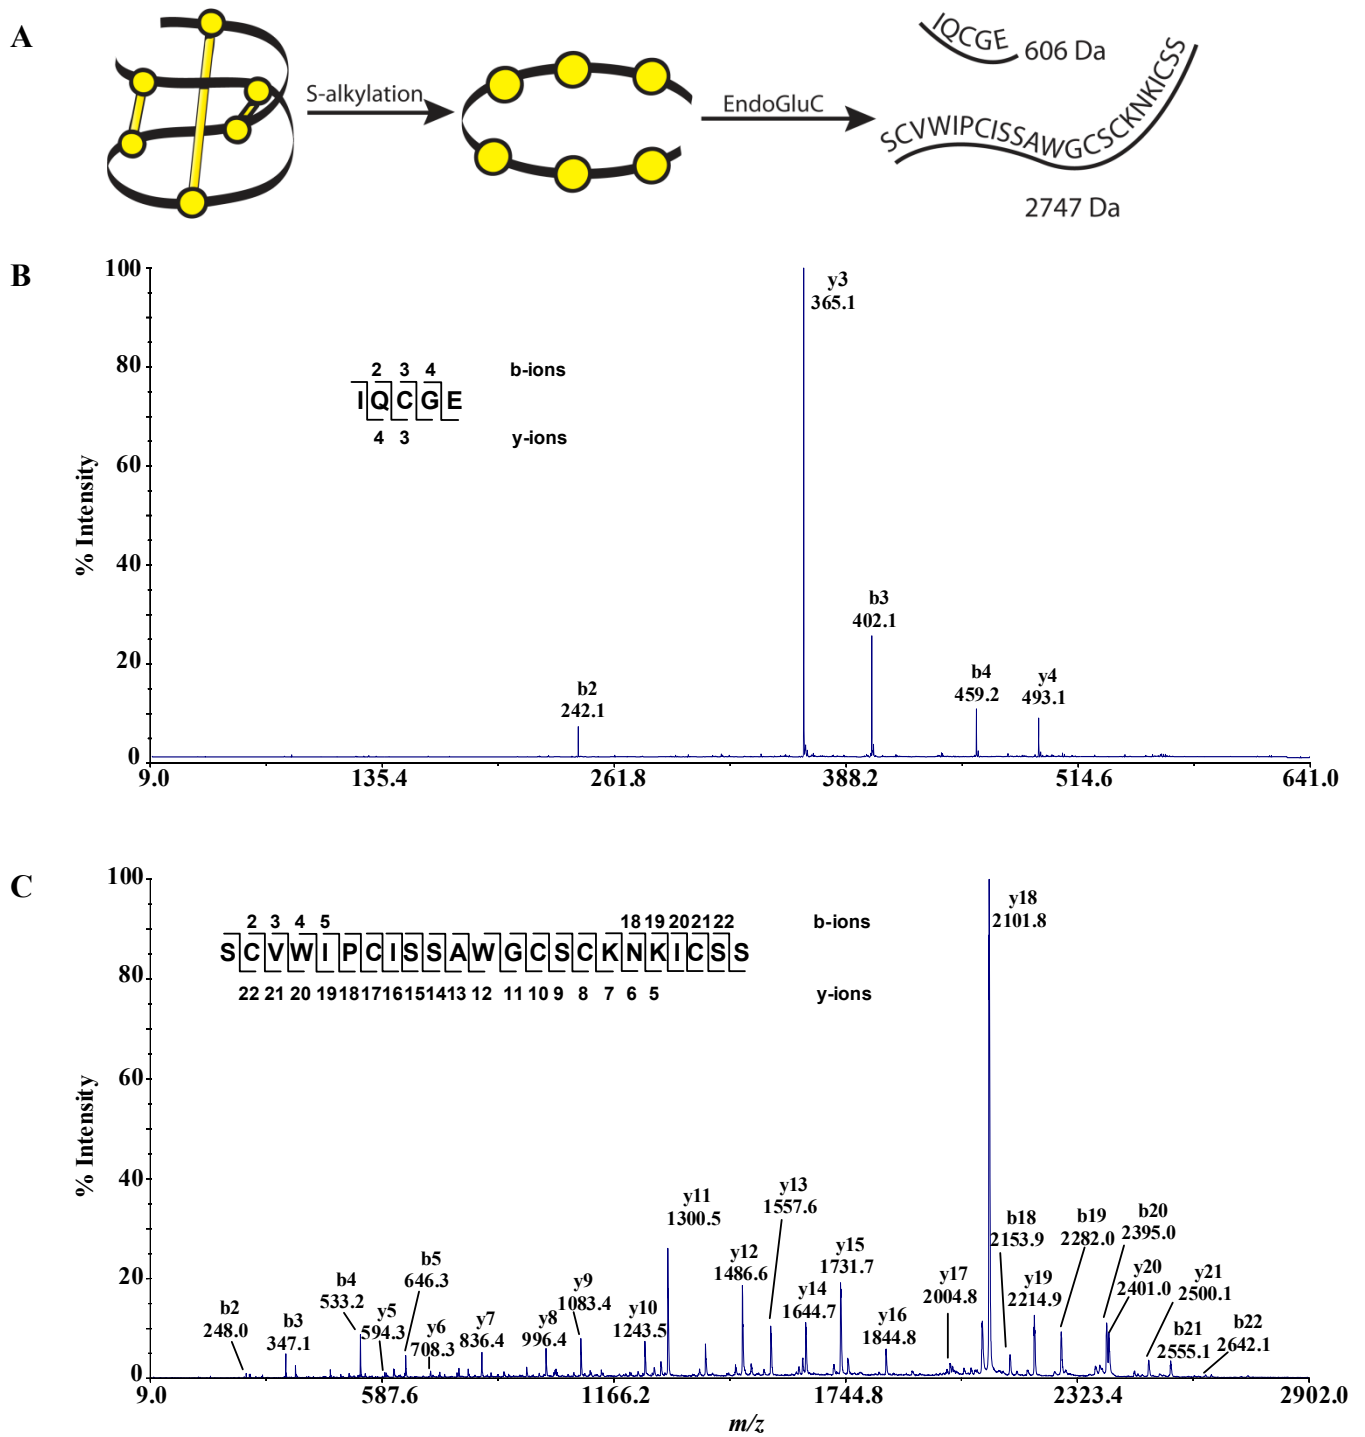

**Figure S1.** (A) Endoproteinase GluC digestion of S-alkylated hedyotide B2 generated two peptide fragments with  $m/z$  of 606 and 2747 Da. (B, C) MS/MS spectra of the resulted peptide fragments.
